# Supplementary figures and images for: Astrin-SKAP complex reconstitution reveals its kinetochore interaction with microtubule-bound Ndc80
Source: eLife journal article supplement (doi:10.7554/elife.26866), 2017-08-25

# Figure 1 - Supplement 1

**A**

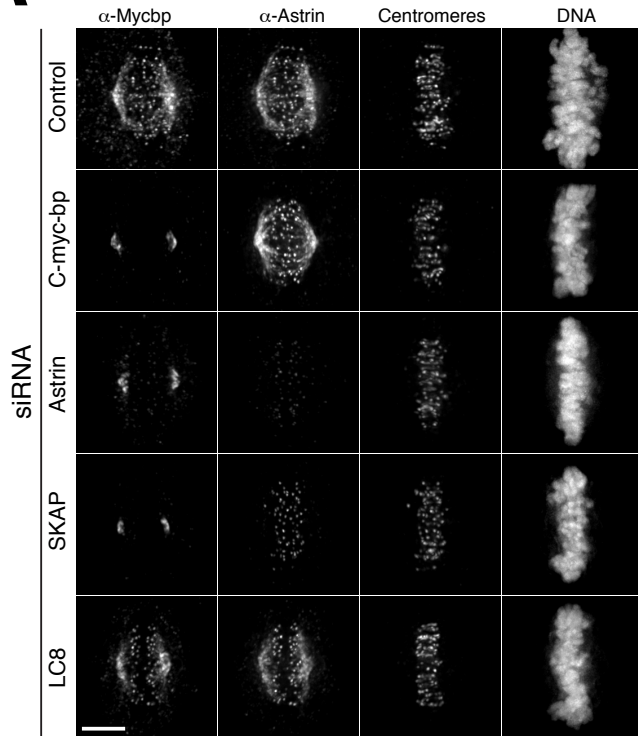

**B**

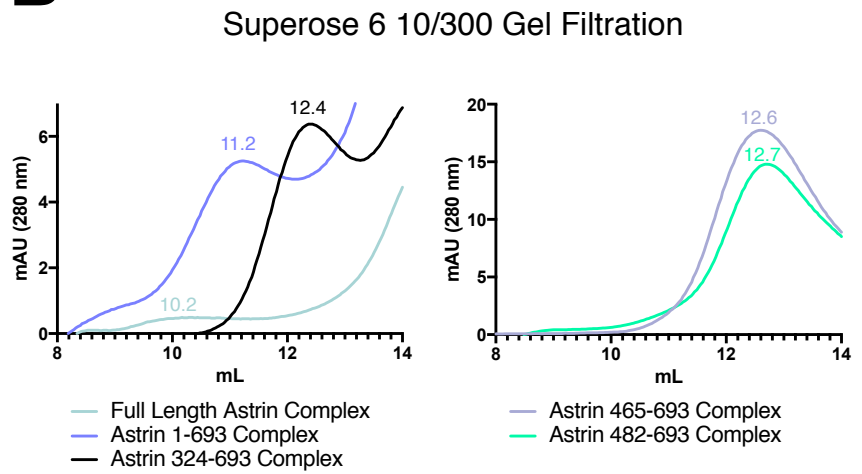

**C**

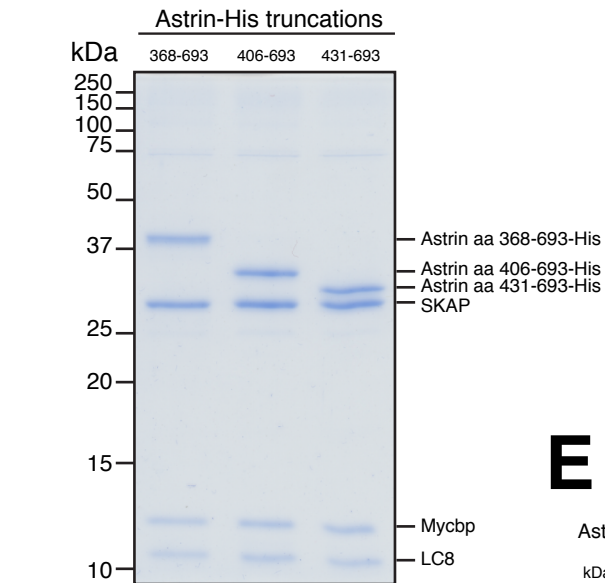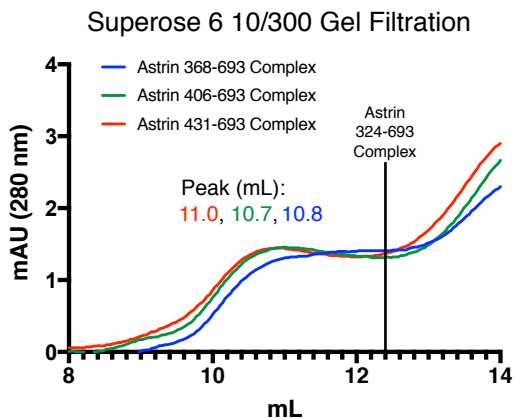

**D**

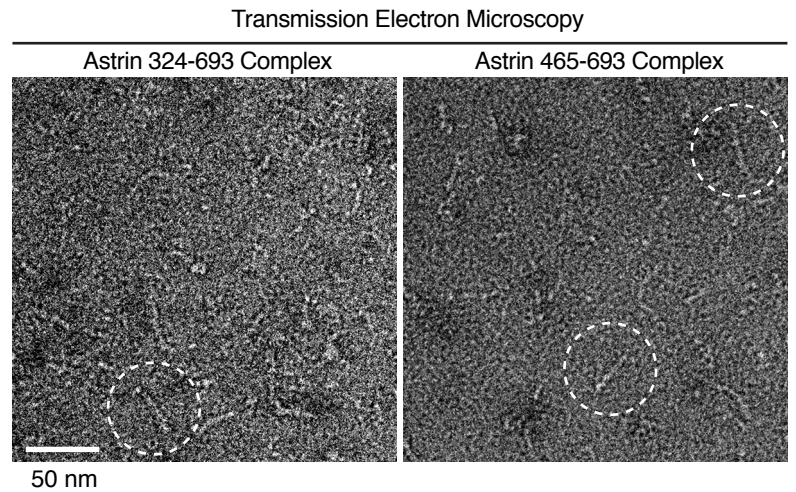

**E**

AUC load  
Astrin 465-693 Complexes

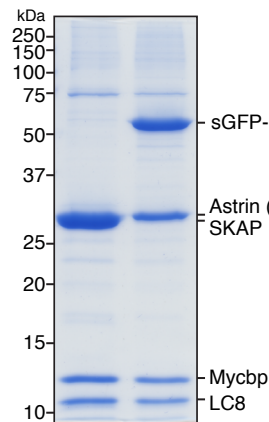

SV-AUC  
(sGFP-SKAP, Astrin 465-693 complex)

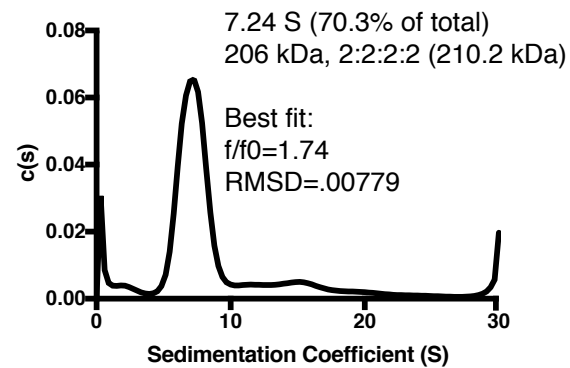

Supplement: supp [file elife-26866-supp-v1.zip]

# Figure 2 - Supplement 1

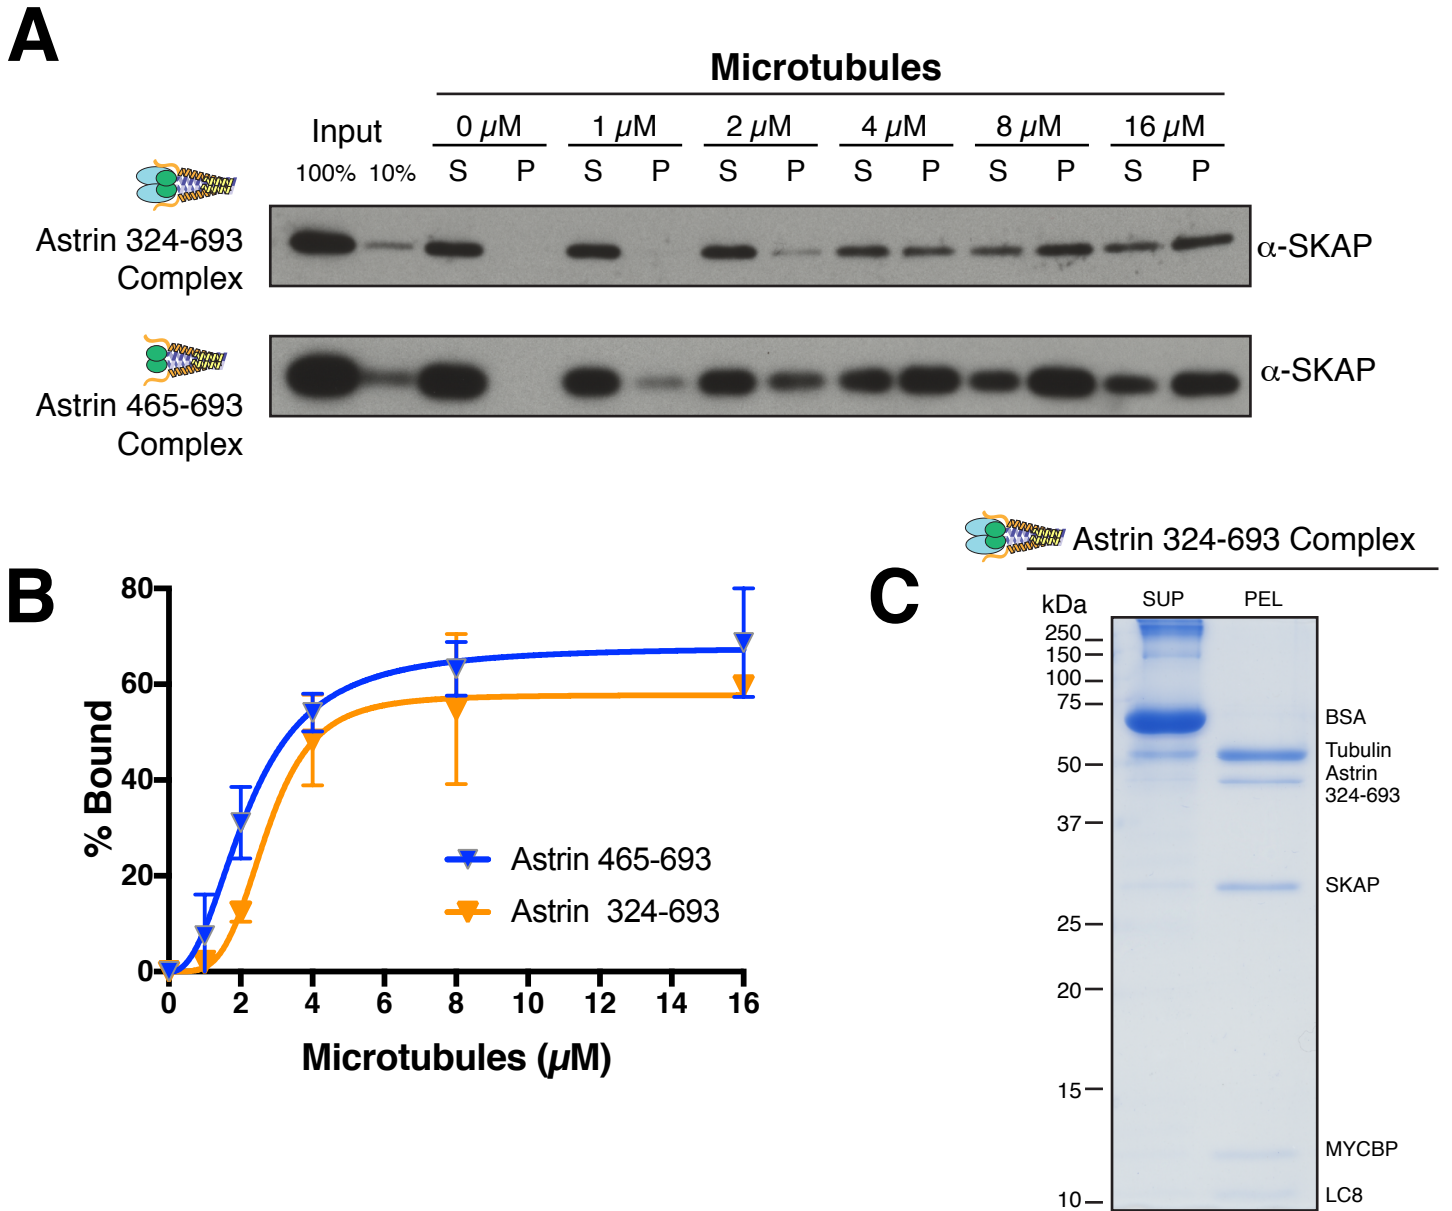

Supplement: supp [file elife-26866-supp-v1.zip]

# Figure 4 - Supplement 1

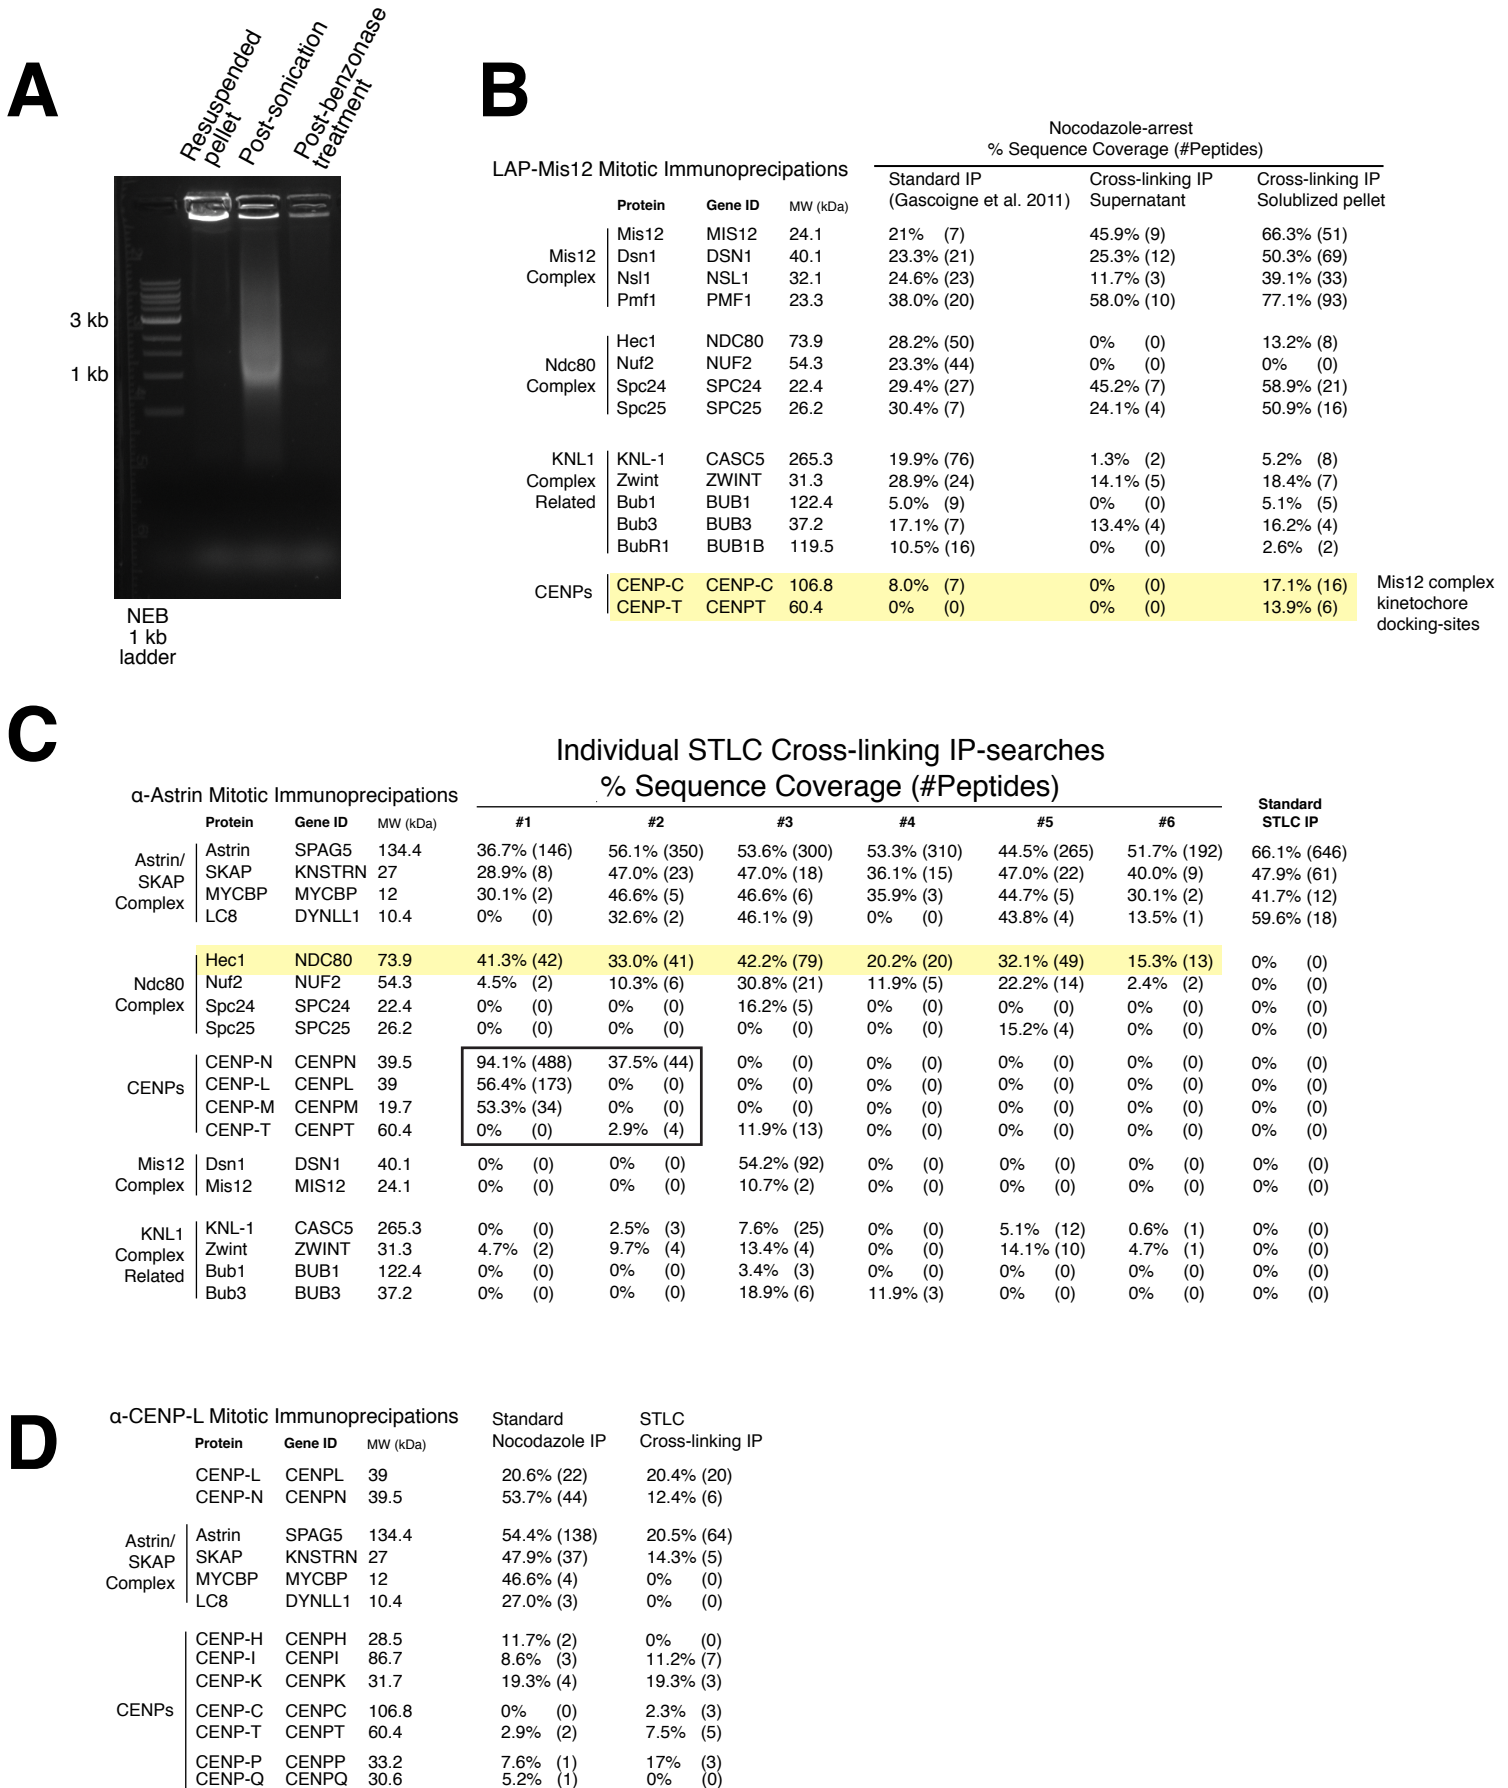

Supplement: supp [file elife-26866-supp-v1.zip]

# Figure 5 - Supplement 1

## A

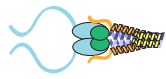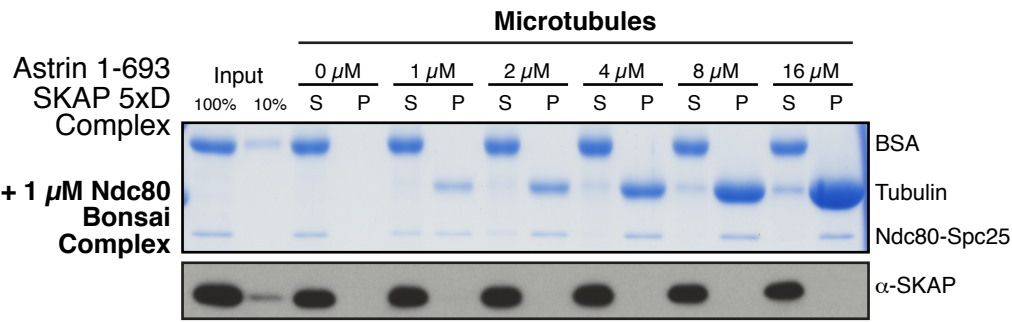

## B

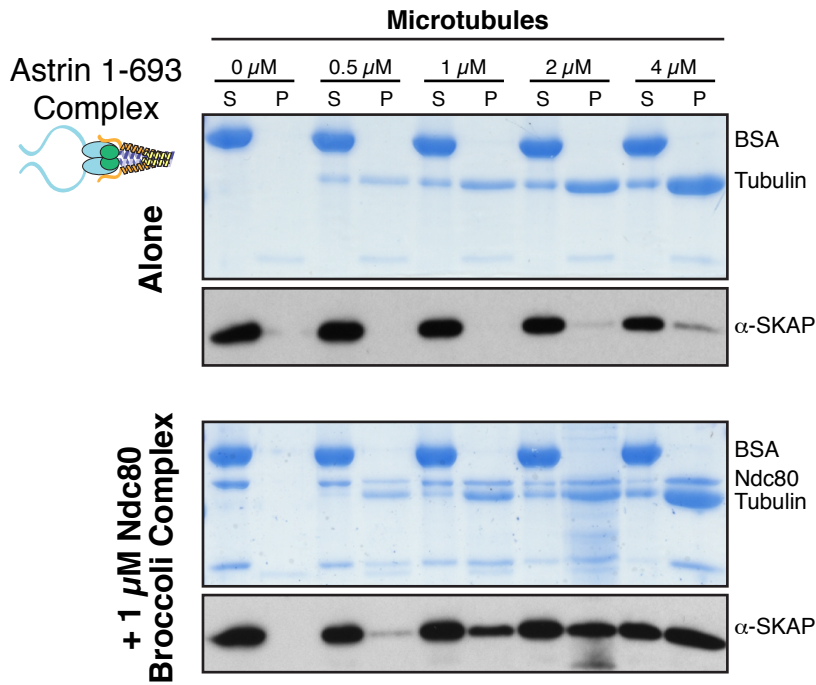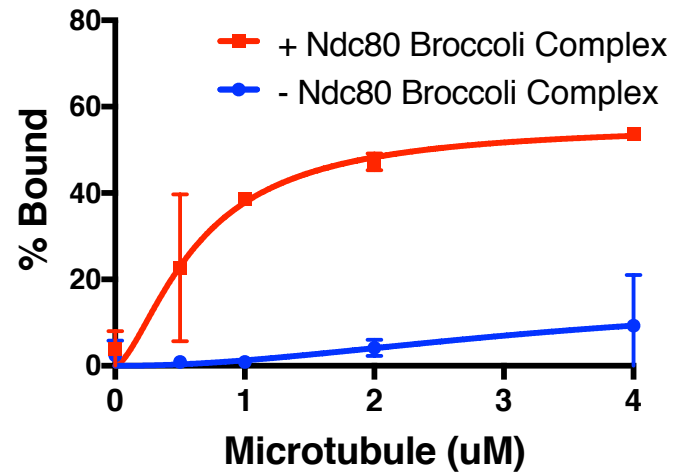

## C

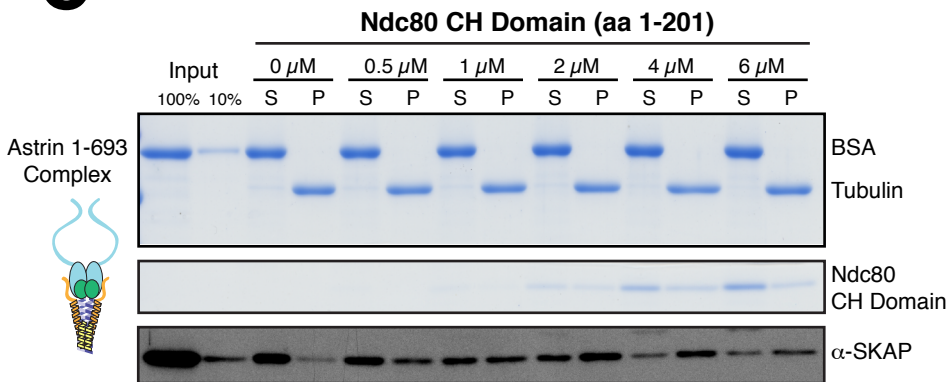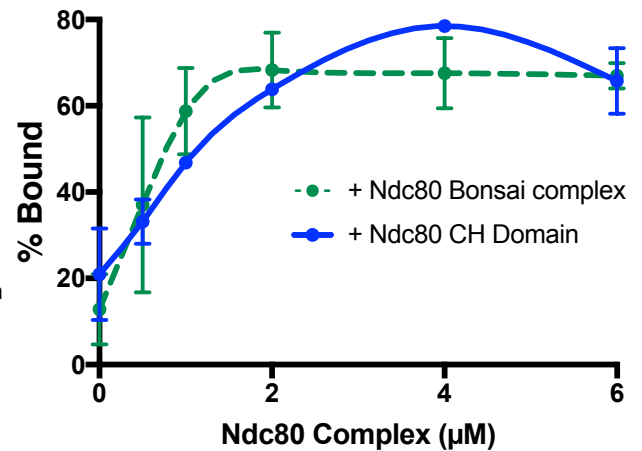

Supplement: supp [file elife-26866-supp-v1.zip]

# Figure 3 - Supplement 1

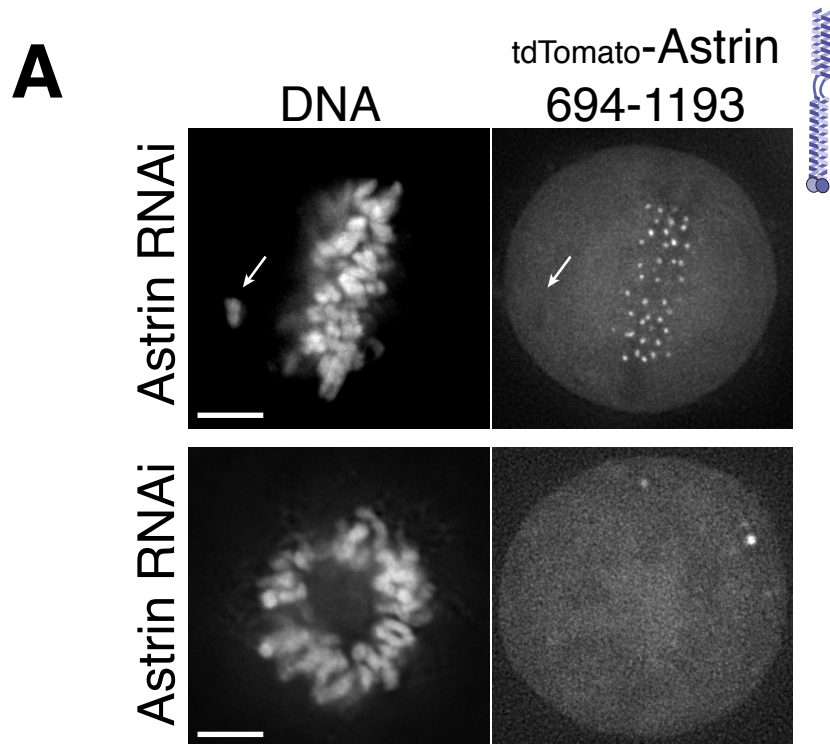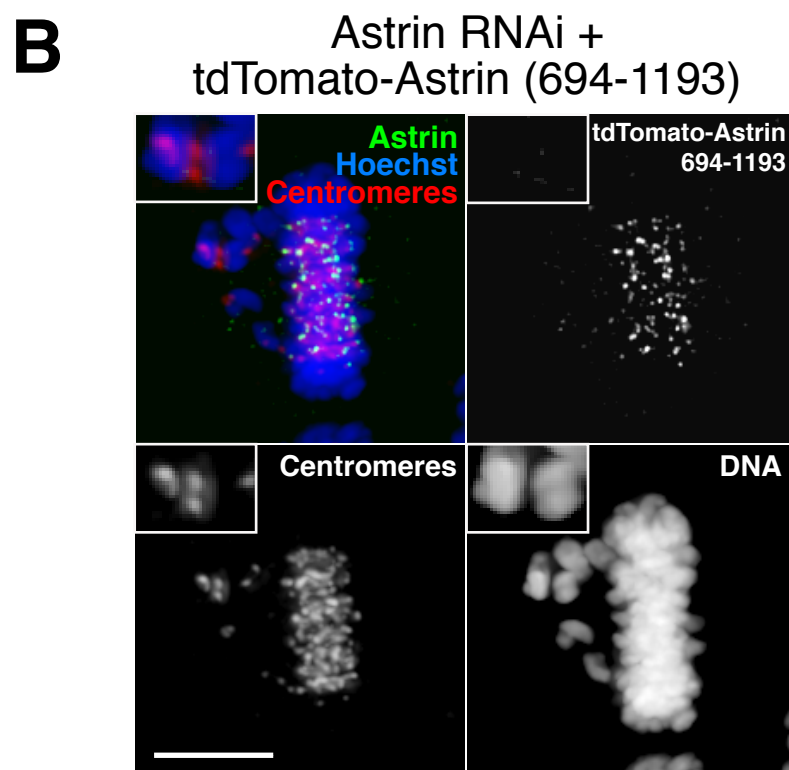

Supplement: supp [file elife-26866-supp-v1.zip]
